# Supplementary material
Source: Springer Nature journal article supplement (http://www.springermedizin.de/resource/supplementary/12891_2007_353_MOESM2_ESM.pdf/9511122)
Supplement: MOESM2 [file 9511122]

A



B



C



D
